# Supplementary material
Source: ML conference proceedings conference paper supplement (https://openreview.net/forum?id=QeuwINa96C)
Supplement: supplementary_material [file USB_Audio.xls]

## Sheet: BestAcc
	gtzan_100	gtzan_400	urbansound8k_100	urbansound8k_400	fsdnoisy_1773	superbks_50	superbks_100	esc50_250	esc50_500
fullysupervised	5.98±0.32	5.98±0.32	16.65±1.71	16.61±1.71	34.85±1.08	2.12±0.11	2.25±0.02	26.0±2.13	26.0±2.13
supervised	52.16±1.83	31.53±0.52	40.42±1.0	28.55±1.9	35.2±1.5	6.8±1.16	5.25±0.56	51.58±1.12	35.67±0.42
pseudolabel	57.29±2.8	33.93±0.69	42.09±2.41	27.0±1.34	35.34±1.6	7.82±1.64	5.16±0.14	49.33±2.52	35.58±1.05
meanteacher	51.4±3.48	31.6±1.46	41.7±3.39	28.91±0.93	35.83±1.22	5.95±0.44	5.39±0.42	50.25±1.95	37.33±1.2
pimodel	74.07±0.62	33.18±3.64	54.24±6.01	25.89±1.51	35.73±0.87	64.39±4.1	25.48±4.94	47.25±1.14	36.0±1.62
vat	79.51±1.99	35.38±7.8	49.62±2.42	27.68±1.39	32.07±1.05	2.18±0.08	2.23±0.08	46.42±1.9	36.92±2.25
mixmatch	74.53±2.4	68.98±0.93	47.63±0.34	42.02±2.59	53.43±0.62	9.41±1.24	8.89±0.75	60.17±1.9	54.75±1.34
remixmatch	90.0±0.0	90.0±0.0	88.49±0.34	90.72±3.77	93.63±0.73	90.13±0.08	90.17±0.27	98.0±0.0	98.0±0.0
adamatch	31.38±0.41	20.73±0.67	35.76±6.39	21.15±1.22	27.95±0.74	2.49±0.08	2.49±0.1	39.17±1.74	31.33±1.23
uda	46.56±8.69	23.62±0.63	37.28±3.17	20.27±1.58	30.8±0.47	2.52±0.15	2.62±0.1	42.75±0.89	33.5±1.95
fixmatch	36.04±4.57	22.09±0.65	36.12±4.26	21.43±2.88	30.31±1.08	4.84±3.57	2.38±0.03	37.75±3.19	30.67±1.05
flexmatch	34.6±4.07	21.82±1.17	40.18±2.73	22.82±3.1	26.36±0.55	2.42±0.08	2.57±0.25	39.58±0.59	29.92±1.85
dash	47.0±3.65	23.42±0.83	42.02±5.02	22.26±0.89	33.19±0.95	5.7±4.4	2.52±0.16	48.17±1.16	32.75±2.27
crmatch	40.58±3.97	22.64±1.22	39.47±4.66	20.11±2.63	30.45±1.52	2.4±0.13	2.49±0.08	42.67±0.51	33.58±1.93
comatch	36.93±1.23	22.2±1.39	30.59±2.45	21.35±1.49	27.63±1.35	11.39±0.85	9.44±1.52	40.17±2.08	29.83±1.31
simmatch	32.42±2.18	20.8±0.77	31.7±6.05	19.55±1.89	28.16±0.87	2.57±0.08	2.53±0.22	39.92±2.35	32.83±1.43
freematch	30.96±2.06	21.2±1.28	39.15±2.98	25.37±3.46	25.52±1.5	2.55±0.12	2.52±0.19	39.83±1.25	29.58±1.74
softmatch	33.11±2.32	44.73±32.01	33.85±4.02	21.23±2.39	27.24±1.22	2.34±0.11	2.35±0.11	39.83±3.06	32.17±2.2

## Sheet: Top1_20
	gtzan_100	gtzan_400	urbansound8k_100	urbansound8k_400	fsdnoisy_1773	superbks_50	superbks_100	esc50_250	esc50_500
fullysupervised	6.95±0.3	6.95±0.3	19.49±0.24	19.45±0.25	35.87±0.52	2.52±0.08	2.51±0.07	21.6±0.72	21.6±0.72
supervised	55.15±2.03	33.67±0.33	46.29±4.14	29.97±2.43	36.05±0.74	7.73±1.11	6.13±0.57	46.33±1.11	33.93±0.76
pseudolabel	55.61±1.49	34.43±0.49	45.04±5.14	29.24±2.47	36.35±0.68	7.78±0.66	6.18±0.37	45.31±1.97	29.71±1.17
meanteacher	53.48±3.86	33.51±0.82	45.55±6.39	30.93±1.09	36.77±0.73	7.07±0.55	5.96±0.55	47.38±0.24	33.67±0.09
pimodel	74.3±1.46	33.0±0.94	52.72±5.45	27.0±1.61	36.27±0.62	47.08±1.19	19.67±0.25	42.51±2.65	30.19±1.94
vat	79.02±2.14	34.08±4.4	50.78±2.94	27.43±2.15	33.98±0.51	2.8±0.15	2.63±0.11	43.02±1.4	28.94±1.11
mixmatch	75.23±2.11	68.42±0.65	55.06±5.02	44.35±1.79	53.7±0.6	10.88±0.65	10.8±0.82	54.3±1.42	47.6±0.77
remixmatch	90.0±0.0	90.0±0.0	90.47±0.19	90.73±0.5	94.44±0.27	89.98±0.04	90.02±0.04	98.0±0.0	98.0±0.0
adamatch	33.33±0.43	22.71±0.12	41.63±7.6	25.04±2.69	30.2±0.37	3.33±0.12	3.37±0.11	36.5±1.2	28.78±0.72
uda	46.65±8.2	24.48±0.7	42.56±2.97	24.36±0.38	31.34±0.15	3.53±0.2	3.62±0.21	40.44±1.84	29.51±0.89
fixmatch	36.66±3.98	23.2±0.16	42.14±4.9	25.66±2.42	32.26±0.15	5.82±3.45	3.42±0.06	36.74±1.14	28.55±0.64
flexmatch	35.9±3.25	23.01±0.82	43.03±3.34	25.75±2.29	28.81±0.34	3.6±0.37	3.45±0.18	37.12±0.43	27.37±0.94
dash	46.24±3.09	25.0±0.5	44.28±5.89	27.27±2.37	32.56±0.29	7.24±4.61	3.83±0.28	43.19±3.44	30.7±2.32
crmatch	39.49±3.05	23.79±1.08	42.25±6.02	23.99±1.76	32.53±1.04	3.33±0.05	3.37±0.17	40.57±2.92	30.02±1.51
comatch	37.63±0.94	23.7±1.05	37.0±3.12	25.42±1.92	30.01±0.15	13.15±0.53	9.94±1.68	36.2±1.49	27.03±0.9
simmatch	33.73±1.77	22.0±0.34	36.77±6.39	24.52±1.85	29.26±0.12	3.78±0.15	3.64±0.21	38.45±1.72	28.49±1.57
freematch	32.87±2.59	22.42±0.97	43.42±5.0	26.08±1.54	28.62±0.69	3.62±0.26	3.61±0.14	36.08±0.75	27.09±1.81
softmatch	34.03±2.38	44.82±31.95	38.05±6.66	24.59±2.21	29.17±0.61	3.36±0.26	3.5±0.19	36.09±2.09	28.79±1.3
