# Supplementary material
Source: ML conference proceedings conference paper supplement (https://openreview.net/forum?id=QeuwINa96C)
Supplement: supplementary_material [file USB_CV.xls]

## Sheet: BestAcc
	cifar100_200	cifar100_400	stl10_40	stl10_100	eurosat_20	eurosat_40	tissuemnist_80	tissuemnist_400	semi_aves_3959
fullysupervised	8.44±0.07	8.44±0.07	47.02±1.48	26.02±0.72	0.94±0.07	0.89±0.05	29.15±0.13	29.1±0.02	41.55±0.29
supervised	35.63±0.36	26.08±0.5	47.02±1.48	26.02±0.72	27.12±1.26	16.9±1.48	59.91±2.93	54.1±1.52	41.55±0.29
pseudolabel	33.16±1.2	25.29±0.67	45.13±4.08	26.2±1.53	23.64±0.9	15.61±2.51	56.22±4.01	50.36±1.62	40.13±0.09
meanteacher	35.61±0.38	25.97±0.37	39.94±1.99	20.16±1.25	26.51±1.15	17.05±2.07	61.4±2.48	55.22±2.06	38.52±0.27
pimodel	36.24±0.27	26.49±0.64	44.38±1.59	25.76±2.37	24.51±1.02	11.58±1.32	56.79±5.91	47.5±1.71	39.23±0.36
vat	31.61±1.37	21.29±0.32	52.03±0.48	23.1±0.72	24.77±1.94	9.3±1.23	58.5±6.41	51.31±1.66	39.0±0.3
mixmatch	37.43±0.58	26.17±0.24	48.98±1.41	25.56±3.0	29.86±2.89	16.39±3.17	55.73±2.29	49.08±1.06	37.22±0.15
remixmatch	20.85±1.42	16.8±0.59	30.61±3.47	18.33±1.98	4.53±1.6	4.1±0.37	59.29±5.16	52.92±3.93	30.4±0.33
adamatch	21.27±1.04	17.01±0.55	36.25±1.89	23.3±0.73	5.7±0.37	4.92±0.87	57.87±4.47	52.28±0.79	31.54±0.1
uda	30.75±1.03	19.94±0.32	39.22±2.87	23.59±2.97	11.15±1.2	5.99±0.75	55.88±3.26	51.42±2.05	32.55±0.26
fixmatch	30.45±0.65	19.48±0.93	42.06±3.94	24.05±1.79	12.48±2.57	6.41±1.64	55.95±4.06	50.93±1.23	31.74±0.33
flexmatch	27.08±0.9	17.67±0.66	37.58±2.97	23.4±1.5	7.07±2.32	5.58±0.57	57.23±2.5	52.06±1.78	33.09±0.16
dash	30.19±1.34	18.9±0.42	43.34±1.46	25.9±0.35	9.44±0.75	7.0±1.39	57.0±2.81	50.93±1.54	32.56±0.39
crmatch	29.43±1.11	18.5±0.26	30.55±2.01	17.43±1.96	14.52±1.34	7.0±0.69	54.84±3.05	51.1±1.59	31.97±0.1
comatch	35.68±0.54	26.1±0.09	29.7±1.17	21.46±1.34	5.25±0.49	4.89±0.86	57.15±3.46	51.83±0.71	41.39±0.16
simmatch	23.26±1.25	16.82±0.4	34.12±1.63	22.97±2.04	6.88±1.77	5.86±1.07	57.91±4.6	51.14±1.83	34.14±0.3
freematch	20.88±0.82	16.15±0.62	36.71±2.09	24.3±2.49	5.99±0.97	5.22±0.3	58.13±3.22	51.7±1.33	32.87±0.55
softmatch	21.58±1.65	16.75±0.41	34.43±0.82	22.22±2.21	5.46±0.92	5.69±0.72	56.8±3.73	51.52±1.33	31.92±0.21

## Sheet: Top1_20
	cifar100_200	cifar100_400	stl10_40	stl10_100	eurosat_20	eurosat_40	tissuemnist_80	tissuemnist_400	semi_aves_3959
fullysupervised	8.66±0.04	8.66±0.04	73.86±1.85	61.09±1.29	1.1±0.05	1.05±0.05	29.58±0.11	29.5±0.06	42.3±0.38
supervised	40.55±0.88	30.49±0.24	73.86±1.85	61.09±1.29	38.34±2.81	26.78±2.65	64.39±4.46	57.18±1.78	42.3±0.38
pseudolabel	37.35±1.06	26.97±0.41	76.92±1.74	63.68±0.73	42.99±2.41	29.11±3.57	60.37±4.65	52.41±2.09	40.96±0.18
meanteacher	40.46±0.69	30.15±1.0	73.27±1.42	59.84±0.83	38.05±4.26	25.72±3.36	63.69±2.7	57.69±1.99	42.25±0.09
pimodel	92.74±0.83	47.62±3.04	87.62±0.73	87.3±0.66	87.36±0.29	38.03±4.18	64.3±11.29	48.53±1.98	40.35±0.33
vat	32.75±1.29	22.31±0.21	75.44±1.88	55.23±2.46	31.69±3.21	14.31±3.6	63.64±9.14	52.9±2.19	39.82±0.15
mixmatch	38.74±0.79	26.74±0.59	89.97±0.02	89.91±0.04	70.85±9.03	30.05±4.89	95.08±1.92	60.86±5.64	37.78±0.18
remixmatch	21.1±1.51	16.98±0.55	31.96±3.63	19.22±2.22	5.08±1.53	4.55±0.28	71.93±2.76	60.79±2.56	30.74±0.37
adamatch	21.53±1.02	17.24±0.58	43.49±5.9	29.19±1.73	7.0±0.9	5.95±0.96	63.06±4.79	55.33±0.98	32.09±0.11
uda	31.33±1.14	20.43±0.3	52.6±2.16	35.2±0.21	12.55±1.04	8.6±1.3	62.55±5.13	54.8±2.59	33.01±0.18
fixmatch	30.95±0.58	19.78±0.98	58.36±1.74	34.71±2.22	14.14±2.89	8.31±2.35	61.76±5.83	54.93±2.22	32.46±0.3
flexmatch	27.81±0.85	18.23±0.71	40.16±2.94	27.65±2.03	8.09±2.42	7.8±0.65	63.63±2.93	55.14±2.12	33.7±0.19
dash	30.64±1.39	19.38±0.37	50.53±2.81	30.77±2.23	12.38±0.98	8.91±1.34	63.32±4.52	54.43±2.01	33.08±0.27
crmatch	29.76±1.11	18.82±0.37	34.48±3.07	18.88±1.91	24.39±5.66	12.81±1.48	60.45±2.06	55.01±1.16	32.67±0.32
comatch	51.43±0.86	38.21±0.6	32.62±1.78	22.82±0.99	5.81±0.62	5.39±1.07	62.16±4.87	54.14±0.86	42.2±0.21
simmatch	23.7±1.21	17.14±0.35	37.5±3.54	24.73±2.54	7.95±2.02	7.32±1.46	62.42±4.93	53.92±2.53	34.77±0.19
freematch	21.23±0.82	16.45±0.54	39.19±3.22	29.0±1.69	8.72±1.34	7.51±1.84	64.58±3.26	55.17±1.72	33.62±0.48
softmatch	21.96±1.69	17.1±0.37	36.97±1.64	26.64±1.49	7.15±0.47	6.89±1.19	62.88±3.85	55.06±2.27	32.6±0.1
