# Supplementary material
Source: ML conference proceedings conference paper supplement (https://openreview.net/forum?id=QeuwINa96C)
Supplement: supplementary_material [file USB_NLP.xls]

## Sheet: BestAcc
	aclImdb_20	aclImdb_100	ag_news_40	ag_news_200	amazon_review_250	amazon_review_1000	yahoo_answers_500	yahoo_answers_2000	yelp_review_250	yelp_review_1000
fullysupervised	5.87±0.01	5.84±0.12	5.74±0.3	5.64±0.05	36.81±0.05	36.88±0.19	26.25±1.07	25.55±0.43	31.74±0.23	32.7±0.58
supervised	20.63±3.13	13.47±0.55	15.01±1.21	13.0±1.0	51.74±0.63	47.34±0.66	37.1±1.22	33.56±0.08	50.27±0.51	46.96±0.42
pseudolabel	26.38±4.04	21.38±1.34	23.86±7.63	12.29±0.4	53.0±1.48	46.49±0.45	38.6±1.09	33.44±0.24	55.7±0.95	47.72±0.37
meanteacher	21.27±3.72	14.11±1.77	14.98±1.1	13.23±1.12	51.67±0.45	47.51±0.24	36.97±1.02	33.43±0.22	51.07±1.44	46.61±0.34
pimodel	49.02±1.37	27.57±15.85	46.84±6.2	13.44±0.76	73.53±6.92	48.27±0.48	41.37±2.15	32.96±0.16	73.35±2.31	52.02±1.48
vat	32.59±4.69	14.42±2.53	15.0±1.12	11.59±0.94	50.38±0.83	46.04±0.28	35.16±0.74	31.53±0.41	52.76±0.87	45.53±0.13
mixmatch	20.11±2.7	15.78±0.57	13.27±1.22	11.85±0.43	63.42±1.34	69.97±7.09	36.2±0.6	33.64±0.16	53.36±0.79	51.87±0.56
remixmatch	50.0±0.0	50.0±0.0	75.0±0.0	75.0±0.0	80.0±0.0	80.0±0.0	90.0±0.0	90.0±0.0	80.0±0.0	80.0±0.0
adamatch	9.62±1.26	7.81±0.46	12.92±1.53	11.03±0.62	46.75±1.23	43.5±0.67	32.97±0.43	30.82±0.29	48.16±0.8	41.71±1.08
uda	50.0±0.0	50.0±0.0	75.0±0.0	75.0±0.0	80.0±0.0	80.0±0.0	90.0±0.0	90.0±0.0	80.0±0.0	80.0±0.0
fixmatch	8.2±0.29	7.36±0.07	22.8±5.18	11.43±0.65	47.85±1.22	43.73±0.45	34.15±0.94	30.76±0.53	50.34±0.4	41.99±0.58
flexmatch	7.35±0.1	7.8±0.24	16.9±6.76	11.43±0.91	45.75±1.21	43.14±0.82	35.81±1.09	31.42±0.41	46.37±0.74	40.86±0.74
dash	8.93±1.27	7.97±0.53	19.3±6.73	11.2±1.12	47.79±1.03	43.52±0.07	35.1±1.36	30.51±0.47	47.99±1.05	41.59±0.61
crmatch	7.88±0.24	7.68±0.35	13.35±1.06	11.36±1.04	46.23±0.85	43.69±0.48	33.07±0.68	30.62±0.47	46.61±1.02	41.8±0.77
comatch	7.36±0.26	7.41±0.2	13.25±1.31	11.61±0.42	48.98±1.2	44.37±0.25	33.48±0.67	30.19±0.22	46.49±1.42	41.11±0.53
simmatch	7.24±0.02	7.44±0.2	14.8±0.57	11.12±0.15	47.27±1.73	43.09±0.5	34.15±0.91	30.64±0.42	46.4±1.71	41.24±0.17
freematch	8.35±0.1	7.73±0.19	13.06±0.32	11.68±0.91	45.57±0.62	43.74±0.45	32.95±0.17	30.86±0.65	45.24±0.44	41.08±0.44
softmatch	7.61±0.5	8.19±1.14	14.25±1.47	11.29±0.66	44.98±0.11	43.5±0.34	32.87±0.43	30.58±0.26	46.29±0.98	40.64±0.53

## Sheet: Top1_20
	aclImdb_20	aclImdb_100	ag_news_40	ag_news_200	amazon_review_250	amazon_review_1000	yahoo_answers_500	yahoo_answers_2000	yelp_review_250	yelp_review_1000
fullysupervised	6.53±0.13	6.53±0.19	5.68±0.19	5.91±0.16	37.09±0.05	37.15±0.17	26.4±0.52	26.04±0.47	31.41±0.15	32.53±1.09
supervised	20.7±3.06	13.61±0.72	14.6±0.99	12.69±1.1	52.11±0.39	47.18±0.47	37.24±1.06	34.09±0.13	49.47±0.29	46.74±0.28
pseudolabel	29.56±4.09	20.31±1.41	21.64±5.84	13.61±1.31	53.03±0.2	47.49±0.57	38.05±0.83	34.0±0.1	54.67±0.3	47.62±0.53
meanteacher	21.39±3.81	14.27±1.85	14.56±0.93	12.71±0.76	52.1±0.21	47.69±0.36	37.64±0.45	33.84±0.09	50.57±1.06	46.78±0.44
pimodel	48.64±1.91	34.86±7.93	41.74±6.68	13.54±0.84	66.39±1.4	48.55±0.28	42.51±1.52	33.74±0.14	68.83±1.11	49.38±0.62
vat	34.9±1.33	15.21±1.79	14.36±1.14	11.34±1.17	50.28±0.49	46.13±0.3	35.54±0.71	32.06±0.21	51.89±1.06	45.48±0.25
mixmatch	19.88±1.96	15.67±0.26	13.09±1.21	11.63±0.55	63.36±1.11	69.77±7.22	36.68±0.74	33.96±0.08	53.41±0.59	52.05±0.67
remixmatch	50.0±0.0	50.0±0.0	75.0±0.0	75.0±0.0	80.0±0.0	80.0±0.0	90.0±0.0	90.0±0.0	80.0±0.0	80.0±0.0
adamatch	9.92±1.3	8.22±0.17	14.05±1.06	11.76±0.66	48.8±0.73	44.35±0.49	33.92±0.22	31.41±0.3	49.32±0.66	42.34±0.31
uda	50.0±0.0	50.0±0.0	75.0±0.0	75.0±0.0	75.69±3.14	79.12±0.63	90.0±0.0	89.44±0.79	80.0±0.0	80.0±0.0
fixmatch	9.48±0.71	8.55±0.27	22.32±4.82	11.64±1.35	49.16±0.79	44.42±0.54	34.81±0.88	31.42±0.29	51.02±1.15	42.69±0.13
flexmatch	8.67±0.52	8.81±0.27	19.22±5.36	12.35±1.3	47.02±0.7	43.7±0.97	35.87±0.52	32.12±0.7	47.5±0.13	41.44±0.1
dash	8.81±0.29	8.55±0.65	19.85±6.34	12.34±1.89	48.02±0.07	44.63±0.52	35.58±0.89	31.67±0.4	48.81±0.33	41.84±0.37
crmatch	9.41±0.64	8.44±0.28	13.7±0.84	11.79±1.37	46.53±0.25	44.39±0.13	33.8±0.29	31.36±0.54	48.16±1.1	42.29±0.15
comatch	8.22±0.59	8.21±0.32	13.19±1.3	11.59±0.83	49.64±0.83	44.51±0.27	34.1±0.32	31.2±0.18	47.36±1.2	42.22±0.39
simmatch	8.51±0.33	8.68±0.34	15.38±0.76	12.6±1.74	47.12±0.6	43.71±0.38	34.69±0.43	31.14±0.22	46.51±1.16	41.54±0.47
freematch	9.47±0.38	8.12±0.44	13.55±0.33	12.0±0.95	47.65±0.86	43.93±0.39	33.5±0.3	31.65±0.5	47.47±0.28	42.14±0.13
softmatch	8.97±0.7	8.57±0.31	14.61±1.23	11.57±0.99	46.14±0.36	44.04±0.23	33.75±0.49	31.31±0.55	47.03±0.43	41.64±0.37
